# Supplementary material for: Comparative Study of the Chemical Constituents and Bioactivities of the Extracts from Fruits, Leaves and Root Barks of Lycium barbarum
Source: PubMed Central journal article supplement (PMC6514792; doi:10.3390/molecules24081585), 2019-04-22
Supplement: molecules-24-01585-s001.pdf [file molecules-24-01585-s001.pdf]

# Supplementary Materials: Comparative study of the chemical constituents and bioactivities of the extracts from fruits, leaves and root barks of *Lycium barbarum*

Xiao Xiao<sup>1,2,†</sup>, Wei Ren<sup>1,2,†</sup>, Nan Zhang<sup>1,2</sup>, Tao Bing<sup>1,2</sup>, Xiangjun Liu<sup>1,2</sup>, Zhenwen Zhao<sup>1,2,\*</sup>, Dihua Shangguan<sup>1,2,\*</sup>

<sup>1</sup> Beijing National Laboratory for Molecular Sciences, Key Laboratory of Analytical Chemistry for Living Biosystems, CAS Research/Education Center for Excellence in Molecular Sciences, Institute of Chemistry, Chinese Academy of Sciences, Beijing, 100190, China

<sup>2</sup> University of the Chinese Academy of Sciences, Beijing 100049, China

<sup>†</sup> These authors contributed equally to this work.

<sup>\*</sup> To whom correspondence should be addressed: \*e-mail: zhenwenzhao@iccas.ac.cn, [sgdh@iccas.ac.cn](mailto:sgdh@iccas.ac.cn)

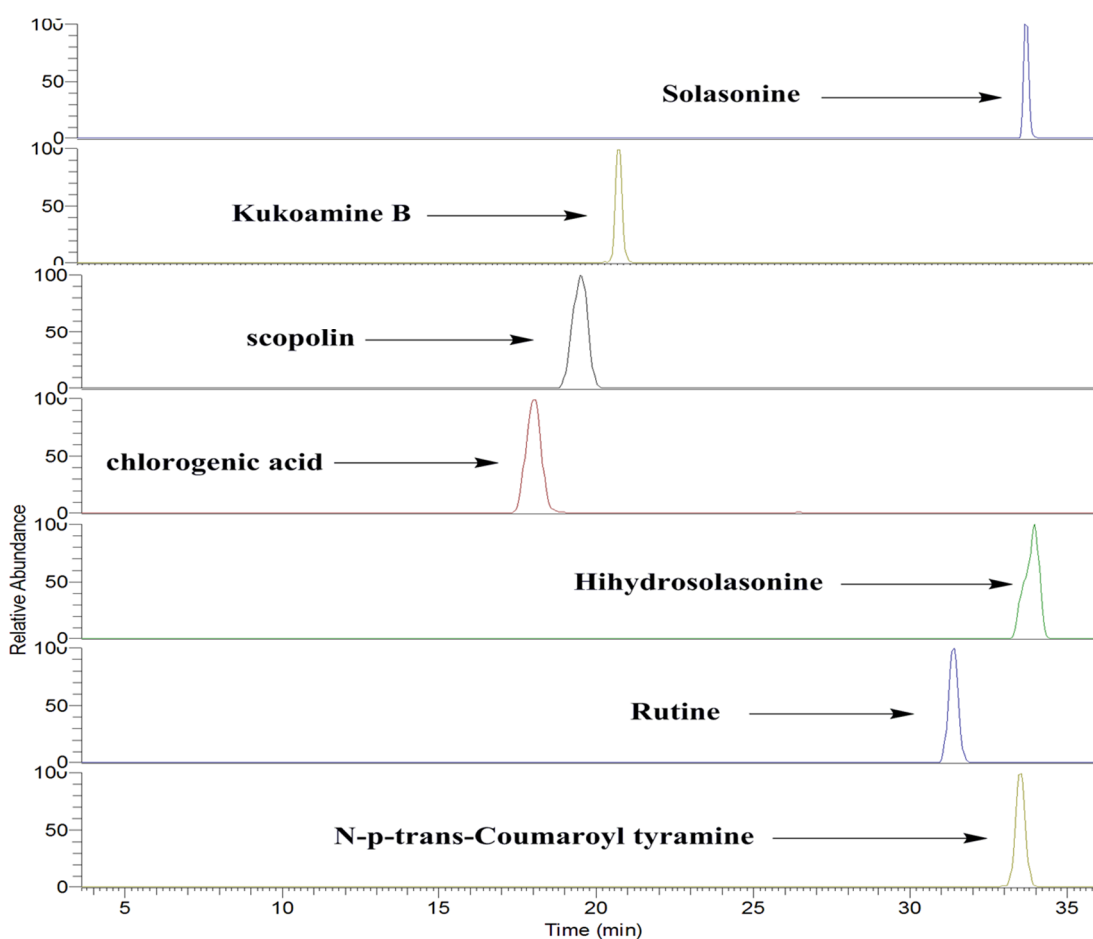

Figure S1. Total ion chromatograms (TICs) of 7 standard substances in the positive ion mode.

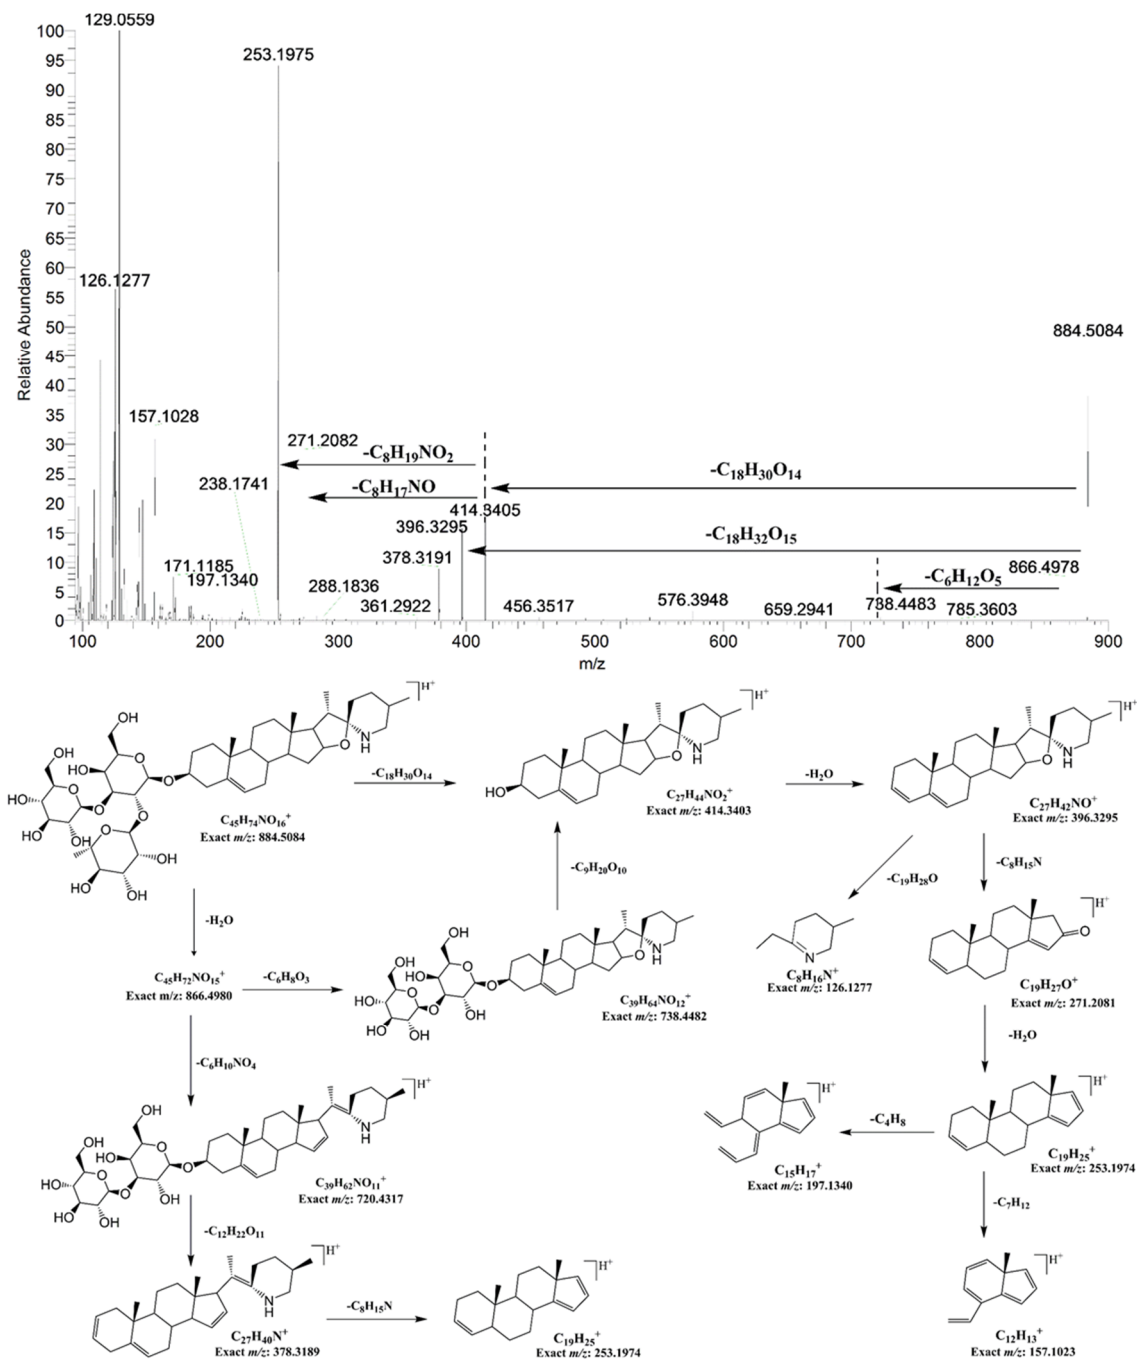

Figure S2. Proposed fragmentation pathway for solasonine, based on HR-Orbitrap MS/MS spectra.

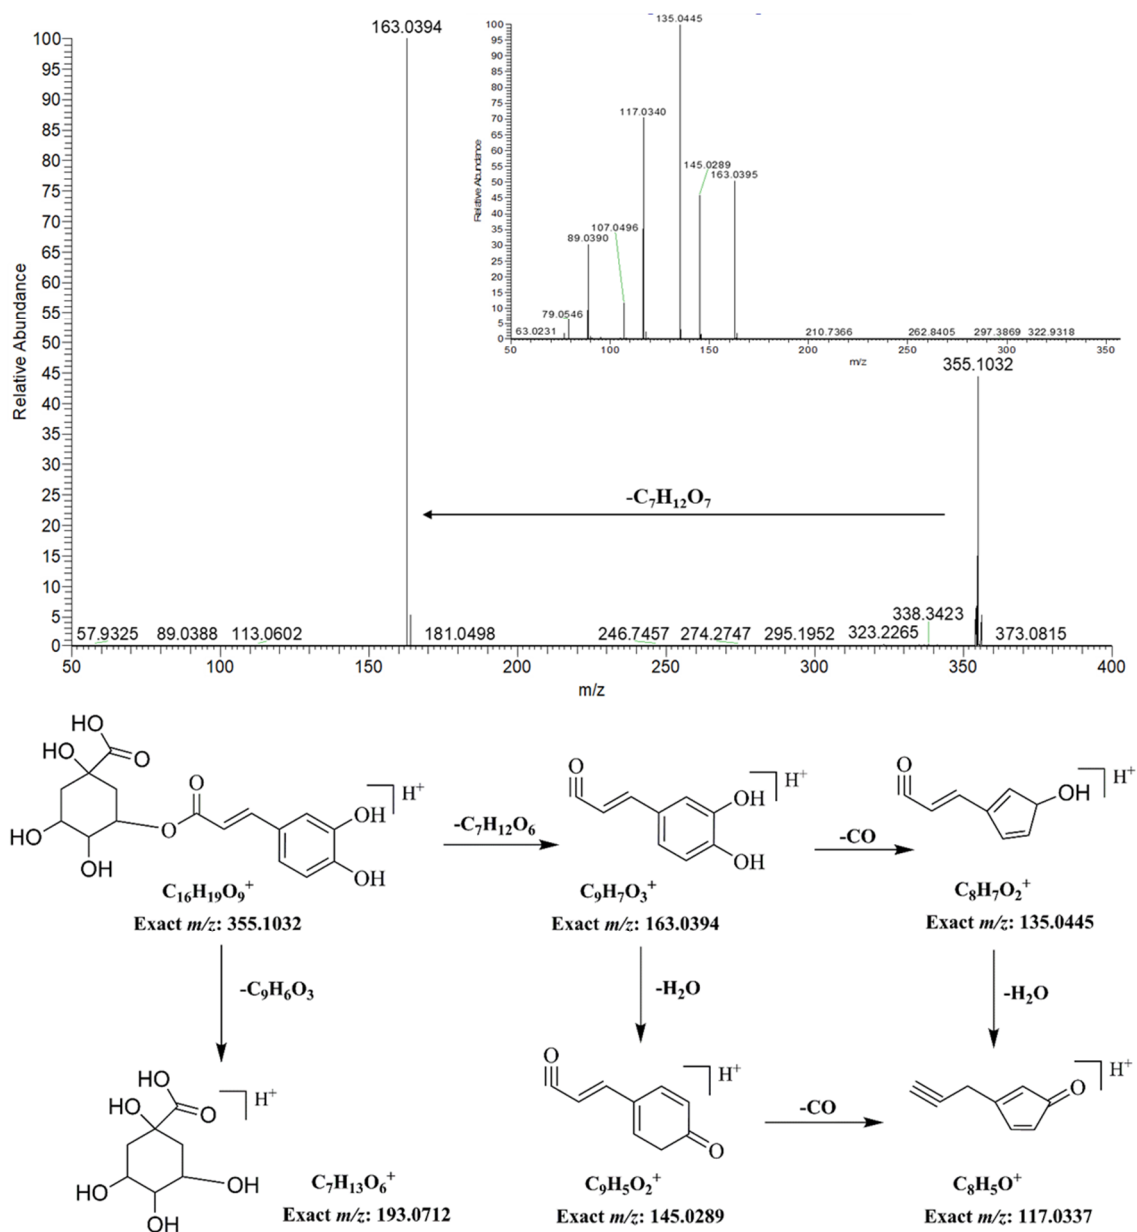

Figure S3. The HR-Orbitrap MS/MS spectra and Proposed fragmentation pathway of chlorogenic acid.

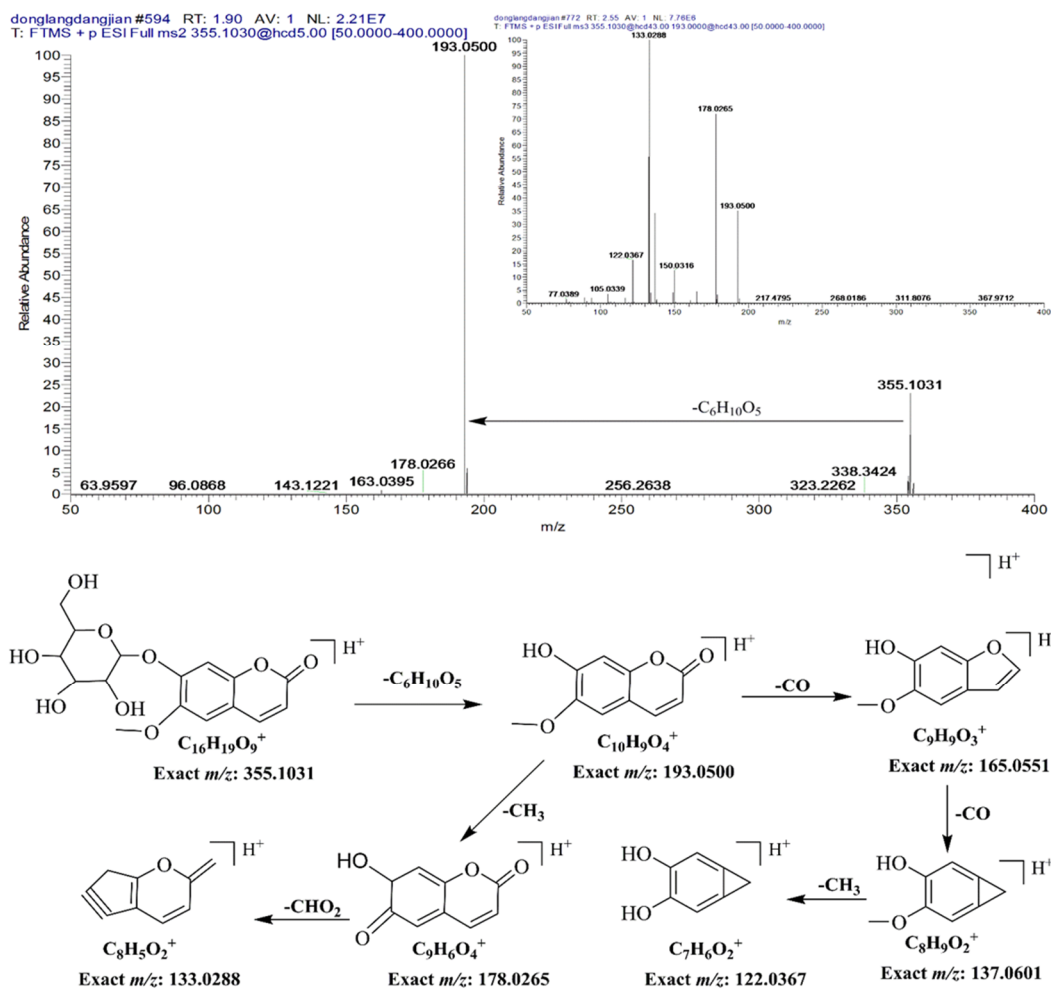

Figure S4. The HR-Orbitrap MS/MS spectra and proposed fragmentation pathway of scopolin.

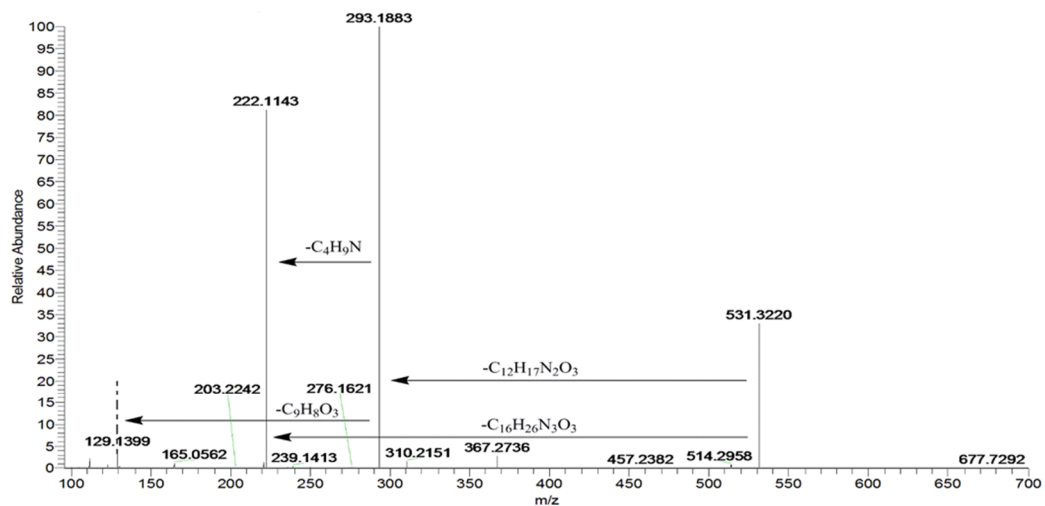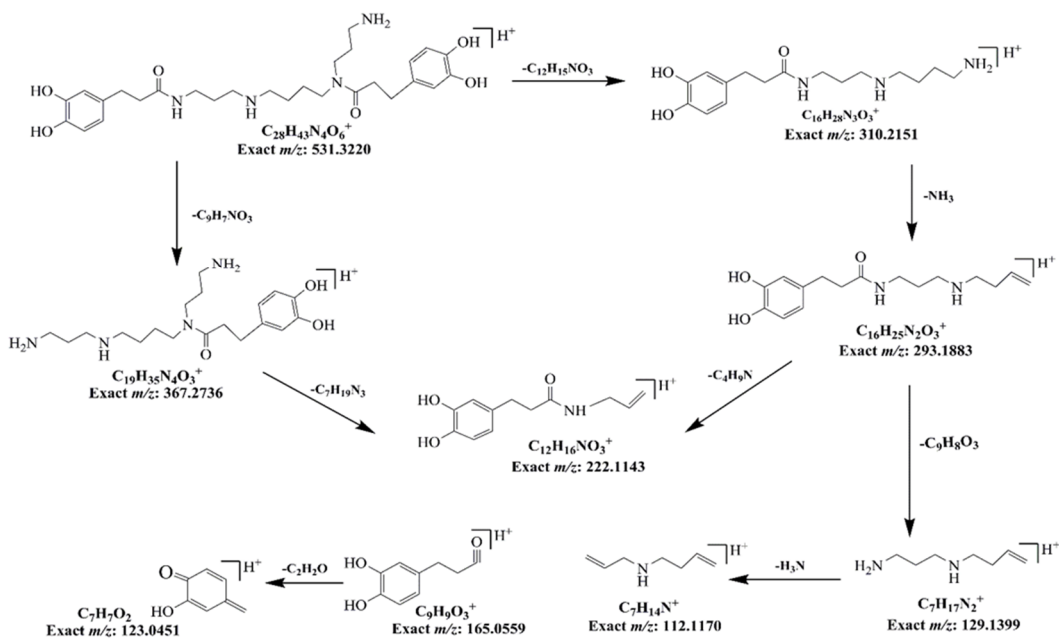

Figure S5. The HR-Orbitrap MS/MS spectrum and the proposed fragmentation pathway of kukoamine B.

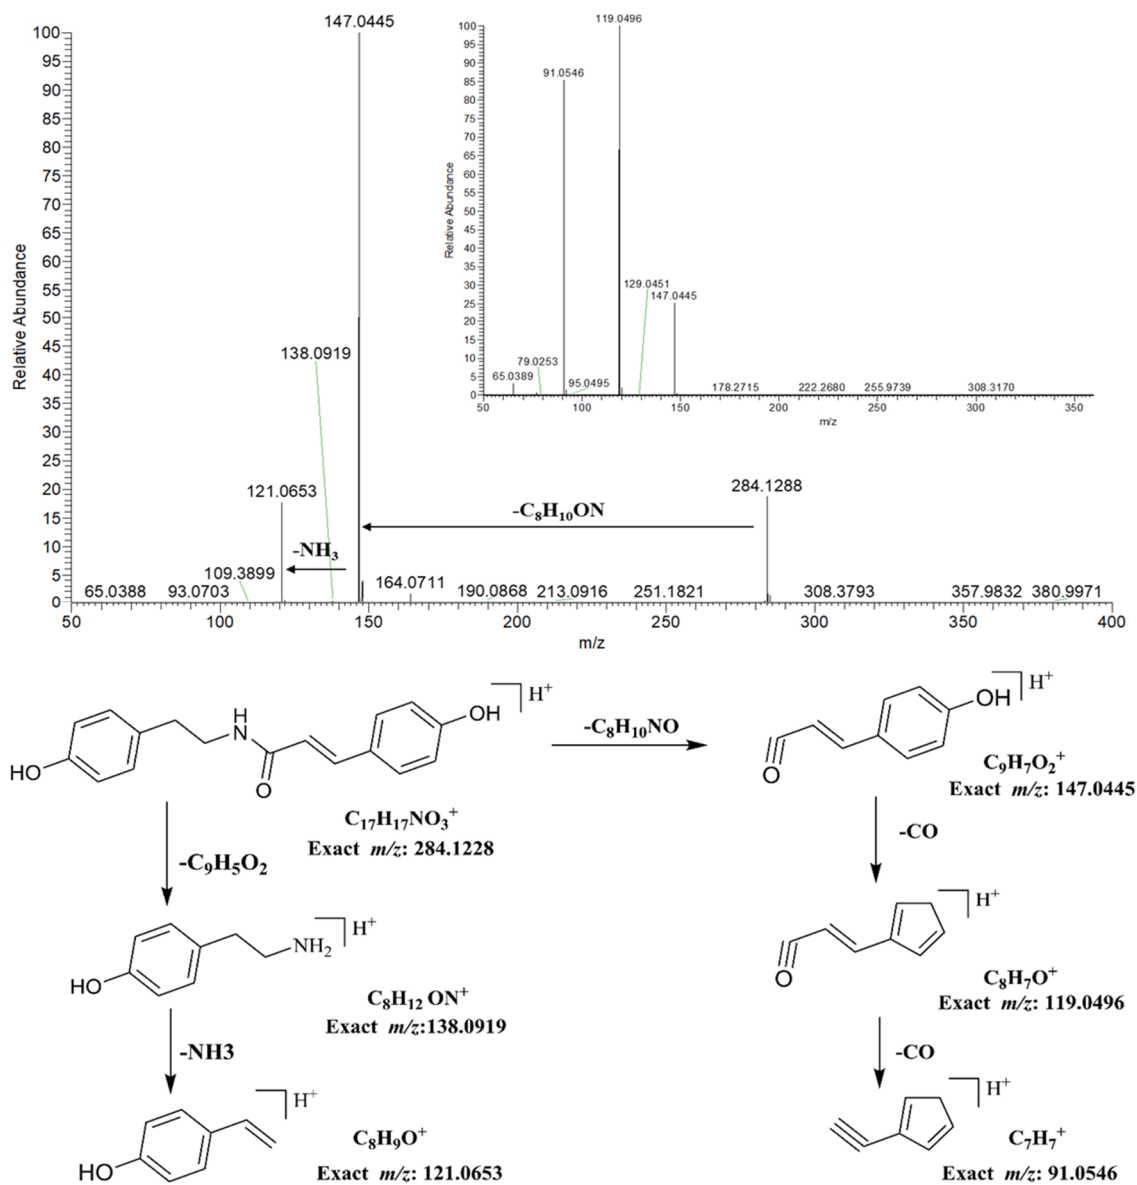

**Figure S6.** The HR-Orbitrap MS/MS spectrum and the proposed fragmentation pathway of N-p-trans-Coumaroyl tyramine.

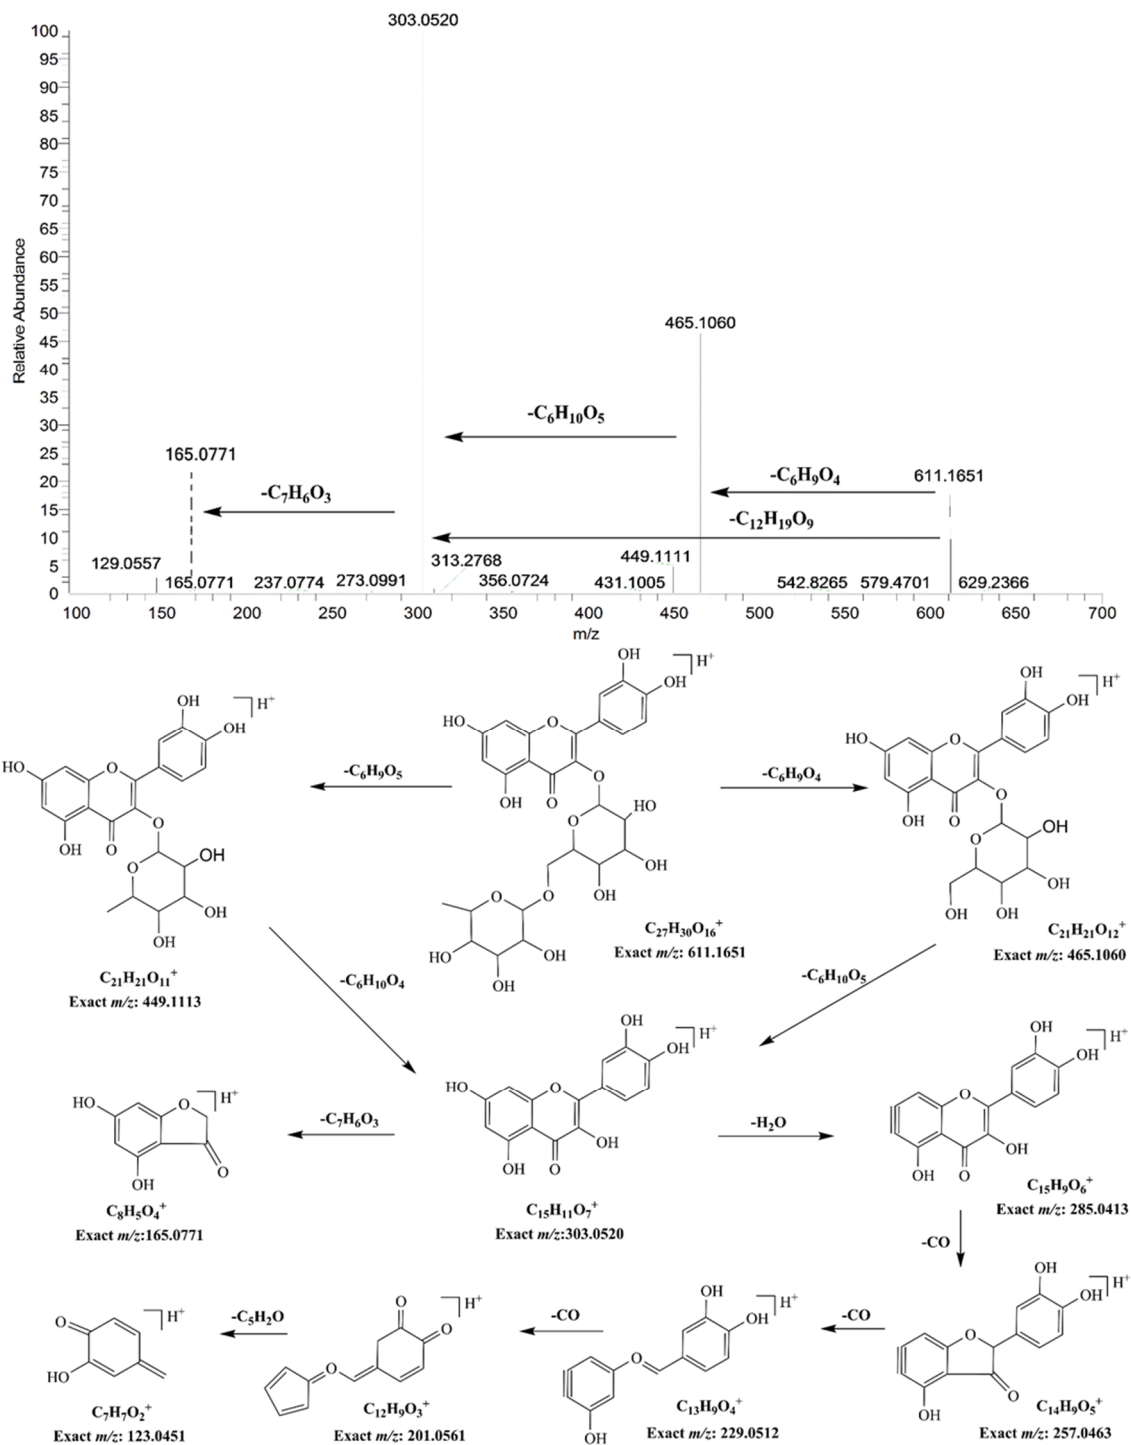

Figure S7. The HR-Orbitrap MS/MS spectrum and the proposed fragmentation pathway of rutin.

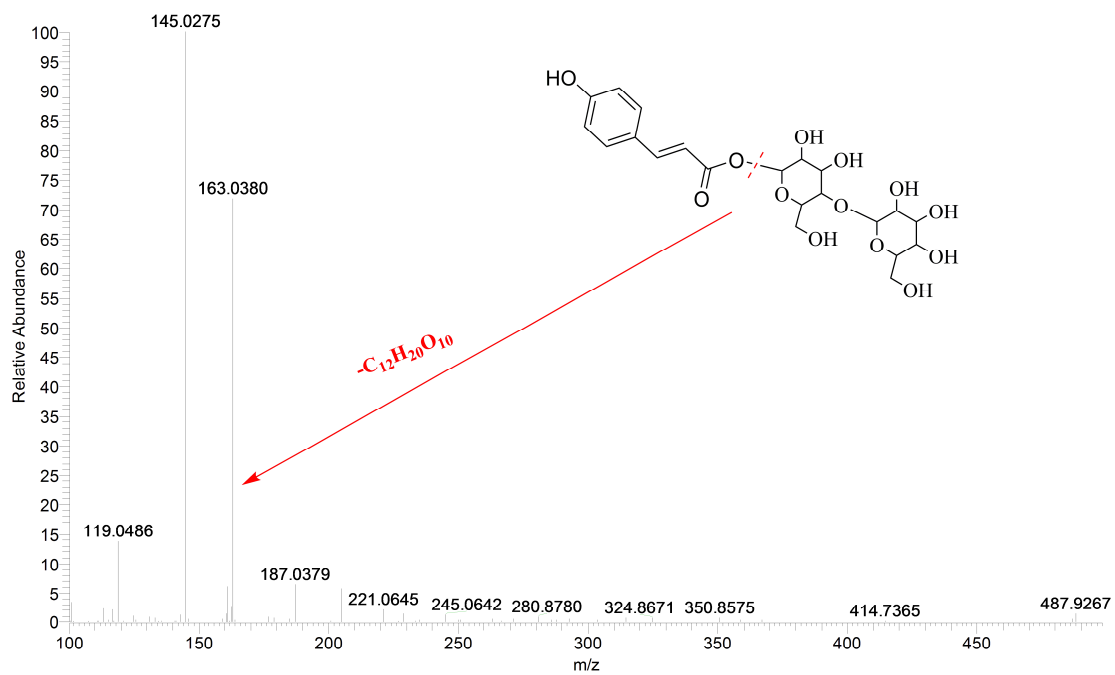

Figure S8. HR-Orbitrap MS/MS spectrum of A1.

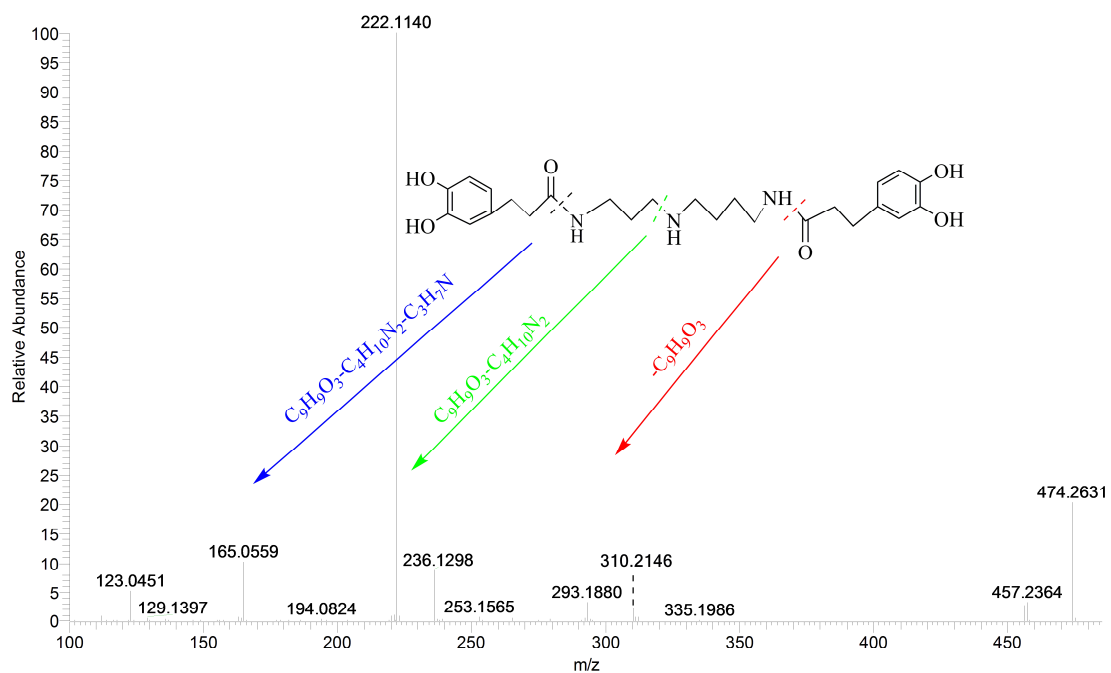

Figure S9. HR-Orbitrap MS/MS spectrum of B52.



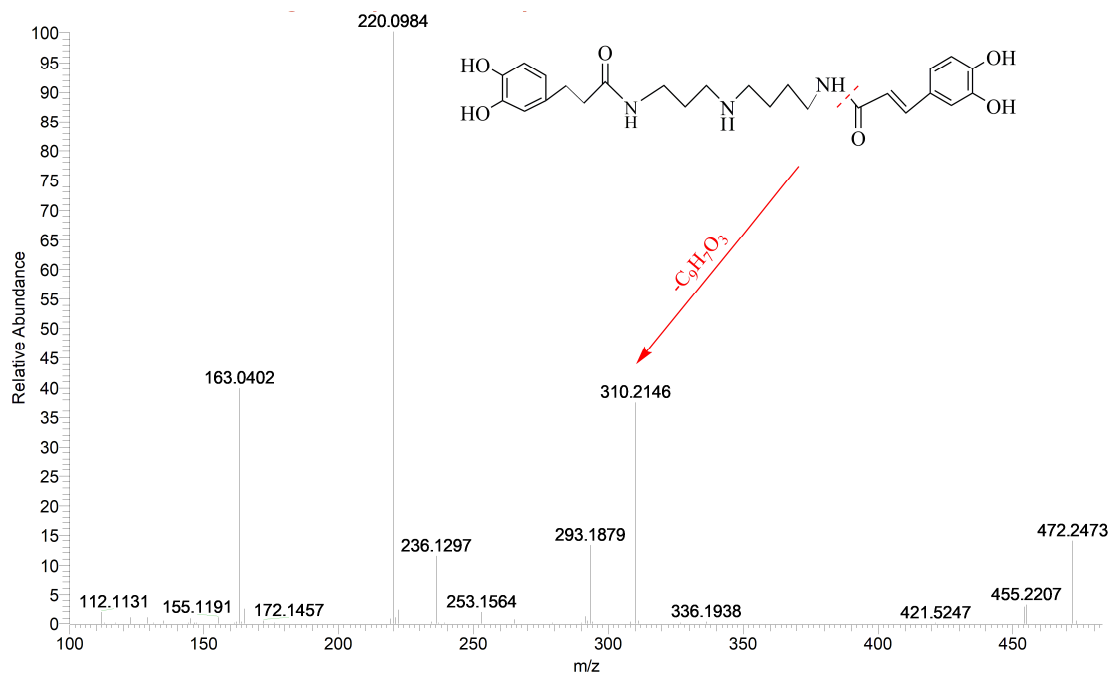

Figure S10. HR-Orbitrap MS/MS spectra of B63.

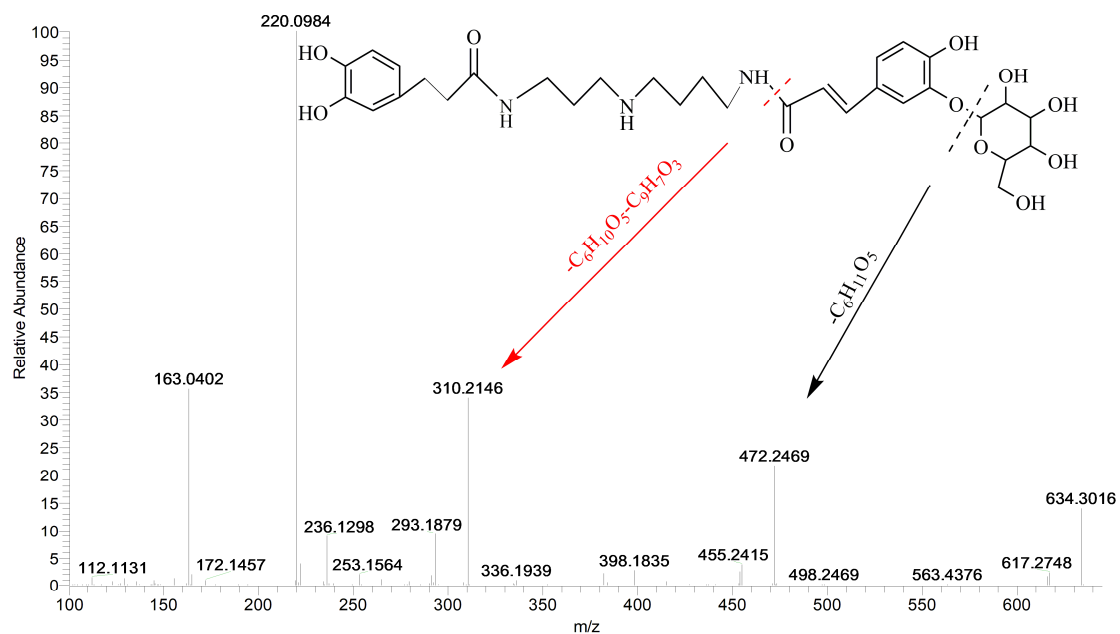

Figure S11. HR-Orbitrap MS/MS spectrum of B18.

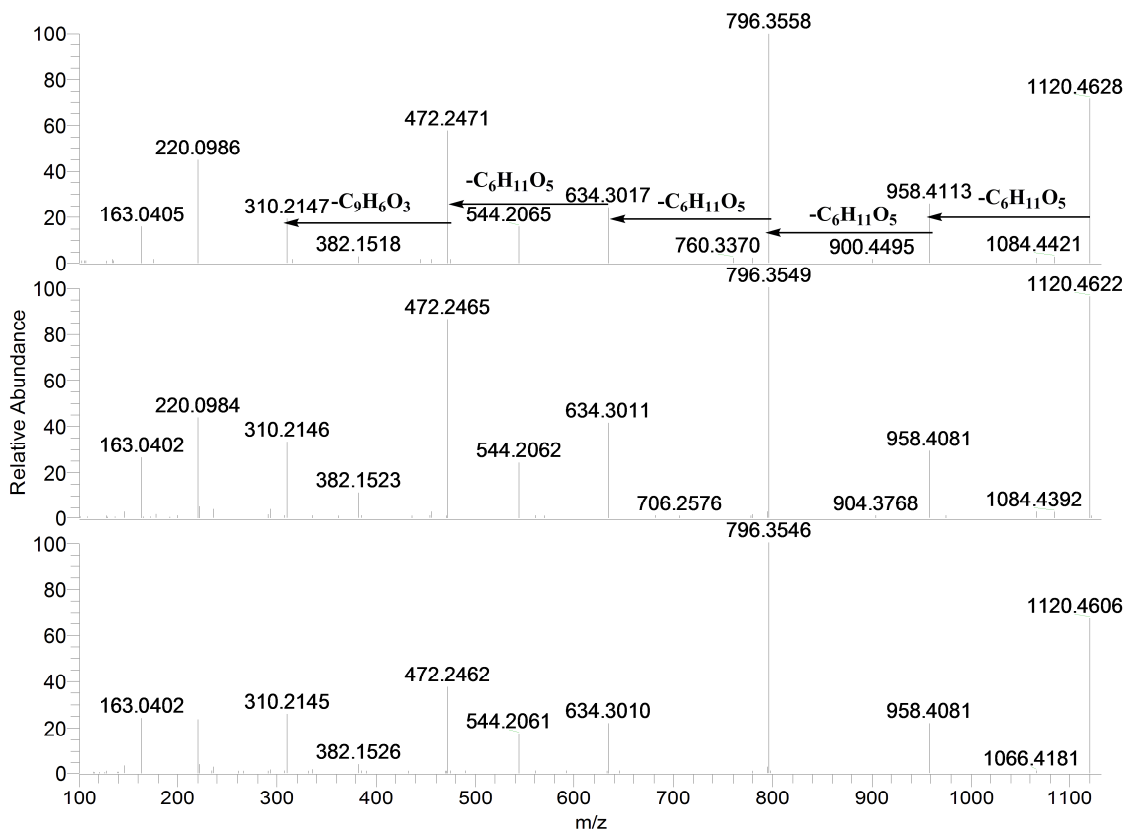

Figure S12. HR-Orbitrap MS/MS spectra of compounds B46, B50 and B54.

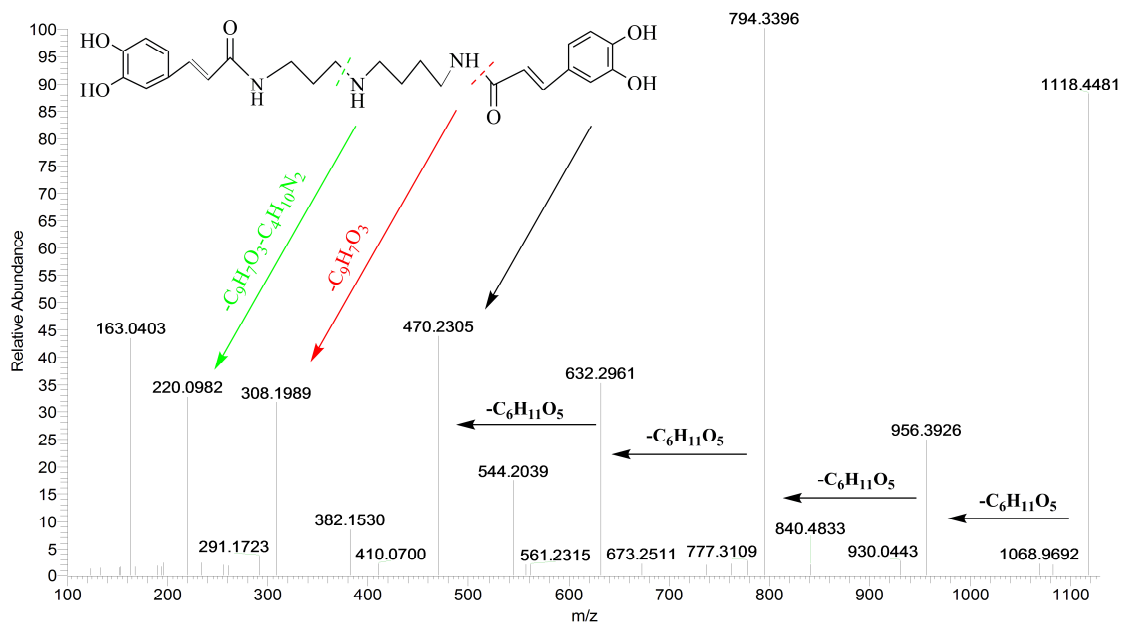

Figure S13. HR-Orbitrap MS/MS spectra of B51.

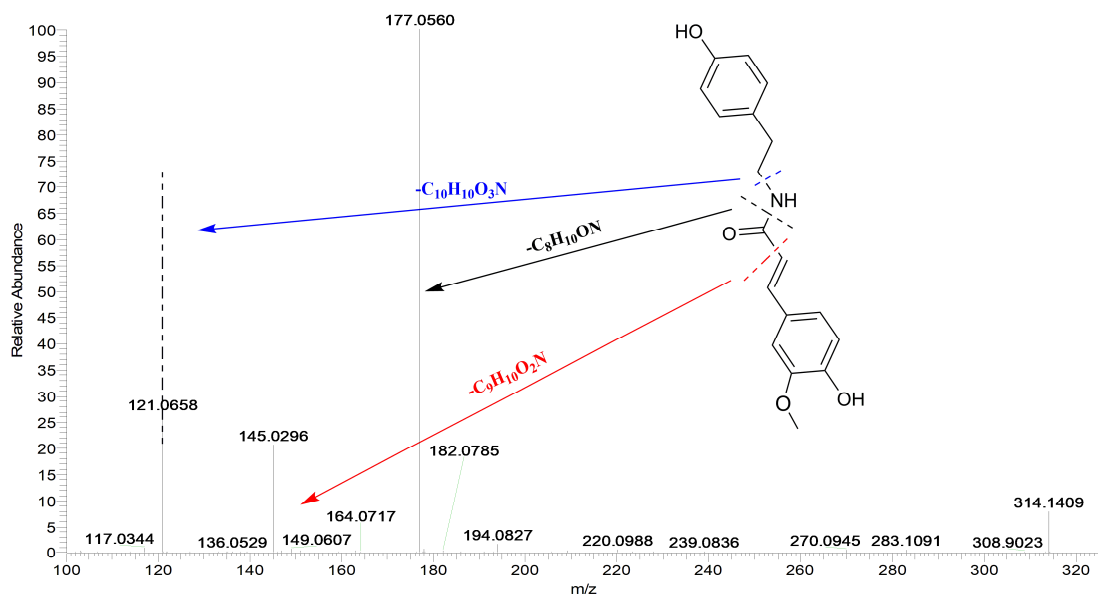

Figure S14. HR-Orbitrap MS/MS spectra of C15.

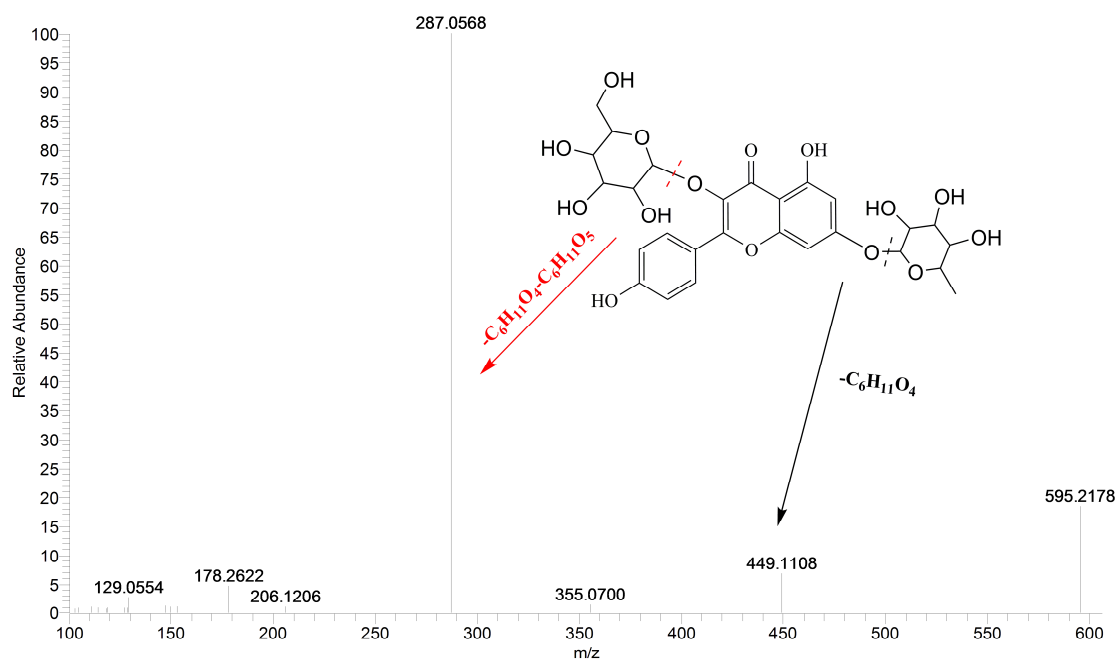

Figure S15. HR-Orbitrap MS/MS spectrum of D6.

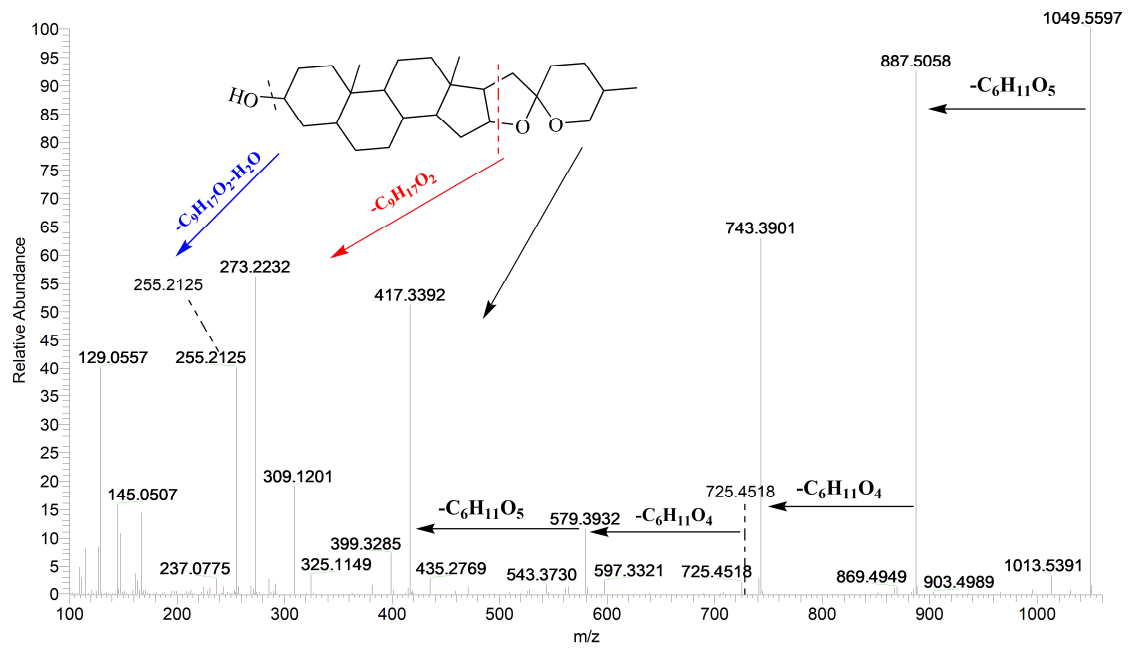

Figure S16. HR-Orbitrap MS/MS spectrum of E3.

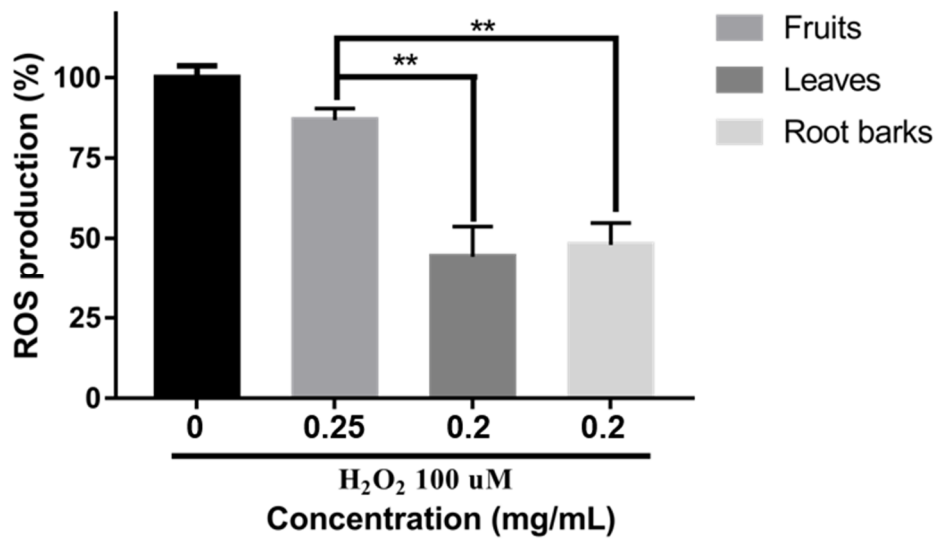

Figure S17. Protection Effect of the extracts from fruits (0.25 mg/mL), leaves and root barks (0.2 mg/mL) on 100  $\mu$ M  $H_2O_2$ -induced intracellular ROS production in L02 cells. Results were expressed as means  $\pm$  SD,  $n=3$ . \*\* $p < 0.01$ .

**Table S1.** <sup>13</sup>C NMR spectral data for aglycone and glycoside moieties of solasonine (SS) and 5,6-dihydrosolasonine (2HSS) in pyridine (C5D5N).

| C  | SS     | 2HSS  | C     | SS     | 2HSS   |
|----|--------|-------|-------|--------|--------|
| 1  | 37.20  | 37.20 | 24    | 31.84  | 30.86  |
| 2  | 29.89  | 30.19 | 25    | 31.43  | 31.17  |
| 3  | 78.13  | 78.47 | 26    | 45.68  | 45.87  |
| 4  | 38.94  | 33.73 | 27    | 19.14  | 19.92  |
| 5  | 140.60 | 43.06 | gal-1 | 100.17 | 100.81 |
| 6  | 121.40 | 28.77 | 2     | 76.26  | 76.26  |
| 7  | 32.26  | 33.38 | 3     | 84.59  | 83.40  |
| 8  | 31.84  | 31.82 | 4     | 70.22  | 70.70  |
| 9  | 49.76  | 48.85 | 5     | 77.45  | 79.58  |
| 10 | 36.85  | 35.69 | 6     | 62.30  | 63.39  |
| 11 | 20.71  | 20.77 | glu-1 | 105.63 | 106.50 |
| 12 | 38.54  | 38.49 | 2     | 62.34  | 63.39  |
| 13 | 40.75  | 41.45 | 3     | 78.13  | 78.47  |
| 14 | 56.04  | 55.67 | 4     | 71.36  | 70.70  |
| 15 | 32.82  | 32.20 | 5     | 78.13  | 79.76  |
| 16 | 78.27  | 79.02 | 6     | 62.34  | 63.39  |
| 17 | 62.20  | 63.31 | rha-1 | 101.98 | 103.20 |
| 18 | 18.38  | 17.96 | 2     | 72.62  | 64.67  |
| 19 | 19.14  | 13.70 | 3     | 74.72  | 73.68  |
| 20 | 41.97  | 42.30 | 4     | 74.90  | 75.38  |
| 21 | 15.87  | 15.53 | 5     | 69.20  | 72.53  |
| 22 | 98.41  | 99.64 | 6     | 14.85  | 13.70  |
| 23 | 32.82  | 33.73 |       |        |        |

**Table S2.** The regression equation, LOD, LOQ, intra-day and inter-day of the 7 standards using the optimized method for calibration.

| Compounds                   | Regression equation          | R <sup>2</sup> | Linearity range<br>( $\mu\text{g/mL}$ ) | LOD<br>( $\mu\text{g/mL}$ ) | LOQ<br>( $\mu\text{g/mL}$ ) | intra-day (n=3)                       |            | Inter-day(n = 6)                      |            |
|-----------------------------|------------------------------|----------------|-----------------------------------------|-----------------------------|-----------------------------|---------------------------------------|------------|---------------------------------------|------------|
|                             |                              |                |                                         |                             |                             | Concentration<br>( $\mu\text{g/mL}$ ) | RSD<br>(%) | Concentration<br>( $\mu\text{g/mL}$ ) | RSD<br>(%) |
| KukoamineB                  | $Y = 235181.48X - 623985.10$ | 0.998          | 2.69-100.88                             | 0.08                        | 0.26                        | 4.9 $\pm$ 0.01                        | 0.2        | 4.9 $\pm$ 0.02                        | 0.4        |
| Rutin                       | $Y = 44449.05X - 3341.72$    | 0.995          | 0.36-49.23                              | 0.02                        | 0.07                        | 43.8 $\pm$ 0.8                        | 1.7        | 43.9 $\pm$ 0.6                        | 1.4        |
| Solasonine                  | $Y = 6888.68X - 848.10$      | 0.989          | 0.72-25.31                              | 0.04                        | 0.12                        | 22.3 $\pm$ 0.6                        | 2.9        | 22.4 $\pm$ 0.5                        | 2.4        |
| Dihydrosolasonine           | $Y = 3972.51X - 12740.89$    | 0.993          | 3.59-99.03                              | 0.10                        | 0.32                        | 20.2 $\pm$ 0.3                        | 1.7        | 22.9 $\pm$ 0.3                        | 1.4        |
| Chlorogenic acid            | $Y = 165955.13X - 390952.12$ | 0.989          | 31.94-207.23                            | 0.07                        | 0.23                        | 23.2 $\pm$ 1.9                        | 4.6        | 23.4 $\pm$ 1.7                        | 3.9        |
| Scopolin                    | $Y = 265223.92X - 162882.35$ | 0.994          | 0.72-25.20                              | 0.02                        | 0.06                        | 33.8 $\pm$ 0.2                        | 1.3        | 34.4 $\pm$ 0.9                        | 3.5        |
| N-p-trans-coumaroyltyramine | $Y = 267005.14X - 107456.73$ | 0.990          | 0.22-25.01                              | 0.06                        | 0.2                         | 2.3 $\pm$ 0.4                         | 1.5        | 2.8 $\pm$ 0.6                         | 2.8        |

**Table S3.** The recoveries of 7 standards (n = 3)

| compounds                   | Initial amount (ug/mL) | Added amount (ug/mL) | Total recovered amount (ug/mL) | Recovery <sup>b</sup> (%) | RSD (%) |
|-----------------------------|------------------------|----------------------|--------------------------------|---------------------------|---------|
| kukoamineB                  | 0                      | 1.25                 | 1.25±0.01                      | 99.79                     | 0.44    |
|                             | 0                      | 2.50                 | 2.46±0.02                      | 98.57                     | 0.86    |
|                             | 0                      | 5.00                 | 5.01±0.04                      | 100.24                    | 0.72    |
| rutin                       | 4.65                   | 1.25                 | 6.27±0.17                      | 101.85                    | 2.80    |
|                             | 4.65                   | 2.50                 | 7.49±0.06                      | 99.79                     | 0.84    |
|                             | 4.65                   | 5.00                 | 10.17±0.15                     | 103.29                    | 1.45    |
| 5,6-dihydrosolasonine       | 2.15                   | 1.25                 | 3.19±0.05                      | 107.69                    | 1.42    |
|                             | 2.15                   | 2.50                 | 4.43±0.24                      | 103.55                    | 5.33    |
|                             | 2.15                   | 5.00                 | 6.26±0.06                      | 99.07                     | 0.65    |
| solasonine                  | 0.11                   | 1.25                 | 2.07±0.01                      | 100.67                    | 2.80    |
|                             | 0.11                   | 2.50                 | 3.13±0.13                      | 92.69                     | 0.84    |
|                             | 0.11                   | 5.00                 | 6.01±0.24                      | 103.98                    | 7.01    |
| scopolin                    | 0.64                   | 1.25                 | 2.07±0.06                      | 100.36                    | 3.55    |
|                             | 0.64                   | 2.50                 | 3.28±0.07                      | 100.22                    | 2.10    |
|                             | 0.64                   | 5.00                 | 5.65±0.03                      | 99.52                     | 0.58    |
| chlorogenic acid            | 0                      | 1.25                 | 1.26±0.01                      | 98.88                     | 0.40    |
|                             | 0                      | 2.50                 | 2.64±0.06                      | 97.67                     | 2.28    |
|                             | 0                      | 5.00                 | 5.14±0.08                      | 96.21                     | 1.52    |
| N-p-trans-coumaroyltyramine | 0.17                   | 1.25                 | 2.20±0.01                      | 112.25                    | 0.40    |
|                             | 0.17                   | 2.50                 | 3.26±0.04                      | 98.34                     | 1.09    |
|                             | 0.17                   | 5.00                 | 5.71±0.10                      | 98.12                     | 1.70    |

**Table S4.** MS/MS parameters for the construction of the database of the 91 compounds in fruit of *L. barbarum* using UPLC- Qtrap-MS in the positive ion mode.

| No. | R     | Q1     | Q3  | Declustering potential (V) | Collision energy (eV) | No. | R     | Q1     | Q3  | Declustering potential (V) | Collision energy (eV) |
|-----|-------|--------|-----|----------------------------|-----------------------|-----|-------|--------|-----|----------------------------|-----------------------|
| A5  | 15.45 | 355.1  | 163 | 180                        | 43                    | B52 | 29.40 | 474.3  | 222 | 180                        | 40                    |
| A7  | 16.88 | 355.1  | 163 | 180                        | 43                    | B53 | 29.44 | 912.4  | 163 | 200                        | 89                    |
| A10 | 18.87 | 355.1  | 193 | 140                        | 45                    | B54 | 29.58 | 1120.5 | 796 | 200                        | 58                    |
| A12 | 20.42 | 355.1  | 163 | 180                        | 43                    | B55 | 29.59 | 634.3  | 220 | 200                        | 51                    |
| B2  | 18.48 | 855.4  | 455 | 200                        | 61                    | B56 | 29.60 | 632.3  | 220 | 200                        | 51                    |
| B3  | 19.3  | 855.4  | 455 | 200                        | 61                    | B57 | 29.64 | 912.4  | 163 | 200                        | 89                    |
| B4  | 19.39 | 1017.5 | 617 | 200                        | 47                    | B58 | 29.71 | 796.3  | 472 | 200                        | 57                    |
| B5  | 19.50 | 531.3  | 293 | 180                        | 39                    | B59 | 29.71 | 794.3  | 470 | 200                        | 60                    |
| B6  | 19.59 | 693.4  | 293 | 200                        | 60                    | B60 | 29.74 | 750.3  | 310 | 180                        | 61                    |
| B8  | 20.60 | 1017.5 | 617 | 200                        | 47                    | B61 | 29.74 | 1118.4 | 632 | 200                        | 58                    |
| B10 | 21.02 | 531.3  | 293 | 180                        | 39                    | B62 | 29.88 | 750.3  | 310 | 180                        | 61                    |
| B12 | 23.31 | 529.3  | 291 | 180                        | 36                    | B63 | 30.03 | 472.2  | 163 | 180                        | 54                    |
| B13 | 23.83 | 958.4  | 472 | 200                        | 60                    | B64 | 30.13 | 634.3  | 220 | 200                        | 51                    |
| B14 | 24.41 | 794.3  | 470 | 200                        | 60                    | B67 | 30.14 | 794.3  | 470 | 200                        | 60                    |
| B15 | 24.41 | 960.4  | 474 | 200                        | 59                    | B70 | 30.56 | 470.2  | 220 | 180                        | 46                    |
| B16 | 24.75 | 798.4  | 474 | 200                        | 57                    | B73 | 30.71 | 963.4  | 384 | 200                        | 52                    |
| B17 | 24.78 | 796.3  | 472 | 200                        | 57                    | C1  | 8.30  | 251.1  | 163 | 200                        | 32                    |
| B18 | 24.80 | 634.3  | 220 | 200                        | 51                    | C2  | 10.26 | 251.1  | 163 | 200                        | 32                    |
| B19 | 24.94 | 958.4  | 472 | 200                        | 60                    | C5  | 30.22 | 476.2  | 177 | 180                        | 50                    |
| B20 | 25.17 | 798.4  | 474 | 200                        | 57                    | C6  | 30.42 | 648.3  | 234 | 200                        | 47                    |



| No. | R     | Q1     | Q3  | Declustering<br>potential (V) | Collision<br>energy<br>(eV) | No. | R     | Q1     | Q3  | Declustering<br>potential (V) | Collision<br>energy<br>(eV) |
|-----|-------|--------|-----|-------------------------------|-----------------------------|-----|-------|--------|-----|-------------------------------|-----------------------------|
| B24 | 25.77 | 958.4  | 472 | 200                           | 60                          | C8  | 31.34 | 486.3  | 234 | 180                           | 40                          |
| B25 | 26.02 | 798.4  | 474 | 200                           | 57                          | C9  | 31.83 | 476.2  | 122 | 180                           | 50                          |
| B26 | 26.10 | 796.3  | 472 | 200                           | 57                          | C10 | 32.09 | 625.3  | 325 | 200                           | 34                          |
| B27 | 26.36 | 960.4  | 474 | 200                           | 59                          | C11 | 32.22 | 498.3  | 184 | 180                           | 34                          |
| B28 | 26.41 | 958.4  | 472 | 200                           | 60                          | C13 | 32.98 | 284.1  | 146 | 180                           | 34                          |
| B29 | 26.44 | 798.4  | 474 | 200                           | 57                          | C14 | 33.33 | 314.1  | 145 | 180                           | 33                          |
| B30 | 26.79 | 958.4  | 472 | 200                           | 60                          | C15 | 33.47 | 284.1  | 146 | 180                           | 34                          |
| B31 | 27.02 | 634.3  | 220 | 200                           | 51                          | C16 | 33.62 | 510.2  | 177 | 180                           | 51                          |
| B32 | 27.03 | 632.3  | 220 | 200                           | 51                          | C17 | 33.81 | 314.1  | 145 | 180                           | 33                          |
| B33 | 27.23 | 958.4  | 472 | 200                           | 60                          | C19 | 34.98 | 643.3  | 177 | 180                           | 61                          |
| B34 | 27.42 | 960.4  | 474 | 200                           | 59                          | C20 | 35.07 | 492.2  | 325 | 180                           | 31                          |
| B35 | 27.51 | 636.3  | 474 | 200                           | 51                          | C21 | 36.57 | 936.4  | 634 | 200                           | 69                          |
| B36 | 27.73 | 632.3  | 220 | 200                           | 51                          | D3  | 27.23 | 773.2  | 303 | 200                           | 66                          |
| B37 | 27.85 | 794.3  | 470 | 200                           | 60                          | D4  | 31.07 | 773.2  | 303 | 200                           | 66                          |
| B38 | 27.91 | 958.4  | 472 | 200                           | 60                          | D5  | 31.39 | 611.2  | 303 | 180                           | 48                          |
| B39 | 28.04 | 796.3  | 472 | 200                           | 57                          | D6  | 31.98 | 595.2  | 287 | 115                           | 29                          |
| B40 | 28.16 | 956.4  | 470 | 200                           | 68                          | E1  | 33.67 | 885.5  | 271 | 200                           | 61                          |
| B41 | 28.30 | 960.4  | 474 | 200                           | 59                          | E2  | 33.72 | 884.5  | 396 | 200                           | 51                          |
| B42 | 28.57 | 634.3  | 220 | 200                           | 51                          | E3  | 33.77 | 1049.6 | 273 | 200                           | 49                          |
| B44 | 28.77 | 912.4  | 163 | 200                           | 89                          | E4  | 33.87 | 886.5  | 398 | 200                           | 52                          |
| B46 | 29.06 | 1120.5 | 796 | 200                           | 58                          | E5  | 33.92 | 903.5  | 273 | 200                           | 47                          |
| B47 | 29.11 | 912.4  | 163 | 200                           | 89                          | E6  | 34.49 | 928.5  | 458 | 200                           | 27                          |

| No. | R     | Q1     | Q3  | Declustering<br>potential (V) | Collision<br>energy<br>(eV) | No. | R    | Q1    | Q3  | Declustering<br>potential (V) | Collision<br>energy<br>(eV) |
|-----|-------|--------|-----|-------------------------------|-----------------------------|-----|------|-------|-----|-------------------------------|-----------------------------|
| B48 | 29.16 | 634.3  | 220 | 200                           | 51                          | F1  | 3.93 | 166.1 | 120 | 200                           | 35                          |
| B49 | 29.23 | 632.3  | 220 | 200                           | 51                          | F2  | 5.51 | 166.1 | 120 | 200                           | 35                          |
| B50 | 29.29 | 1120.5 | 796 | 200                           | 58                          | F3  | 9.95 | 188.1 | 146 | 180                           | 30                          |
| B51 | 29.32 | 794.3  | 470 | 200                           | 60                          |     |      |       |     |                               |                             |
